# Supplementary material for: Phase diagrams of the LiBH4–NaBH4–KBH4 system
Source: Royal Society of Chemistry journal article supplement (doi:10.1039/c7cp03816j), 2017-01-01
Supplement: c7cp03816j1.pdf [file c7cp03816j1.pdf]

# Phase diagrams in the $\text{LiBH}_4\text{-NaBH}_4\text{-KBH}_4$ system

Erika M. Dematteis,<sup>a)b)</sup> Eugenio R. Pinatel,<sup>a)</sup> Marta Corno,<sup>a)</sup> Torben R. Jensen<sup>b)</sup> and Marcello Baricco<sup>a)\*</sup>

<sup>a)</sup>Department of Chemistry and Inter-departmental Center Nanostructured Interfaces and Surfaces (NIS)  
University of Turin, Via Pietro Giuria 7, 10125 Torino, Italy

<sup>b)</sup>Department of Chemistry, Center for Materials Crystallography (CMC) and Interdisciplinary Nanoscience  
Center (iNANO) Aarhus University, Langelandsgade 140, DK-8000 Aarhus C, Denmark

## SUPPLEMENTARY INFORMATION

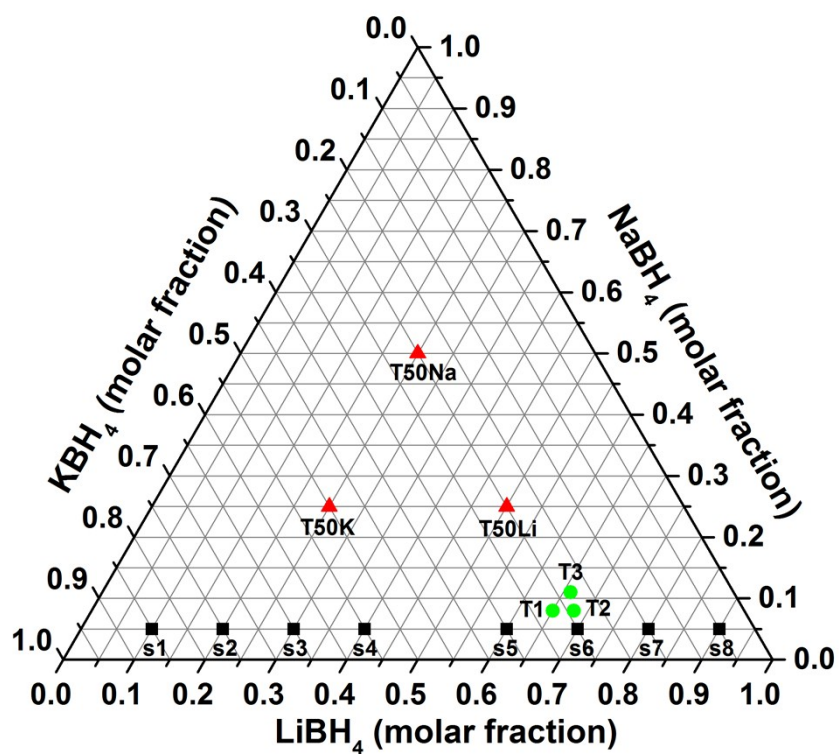

Figure S1 – Investigated compositions in the ternary system. For more details, see Table 1.

**Table S1 – List and details of synchrotron facilities.**

| <b>Facility</b>                             | <b>Beam Line</b> | <b>Wavelength (Å)</b> | <b>Exposure Time (s)</b> | <b>Sample</b>         |
|---------------------------------------------|------------------|-----------------------|--------------------------|-----------------------|
| MAXLAB laboratories, MAX-II<br>Lund, Sweden | I711             | 0.9938                | 30                       | T50Li,<br>T50Na, T50K |
| Dimond Light Source<br>Didcot, UK           | I11              | 0.8259                | 5                        | T1                    |
| DESY<br>Hamburg, Germany                    | PETRA III        | 0.2072                | 5                        | T2                    |
| ESRF<br>Grenoble, France                    | BM01             | 0.7129                | 5                        | T3                    |

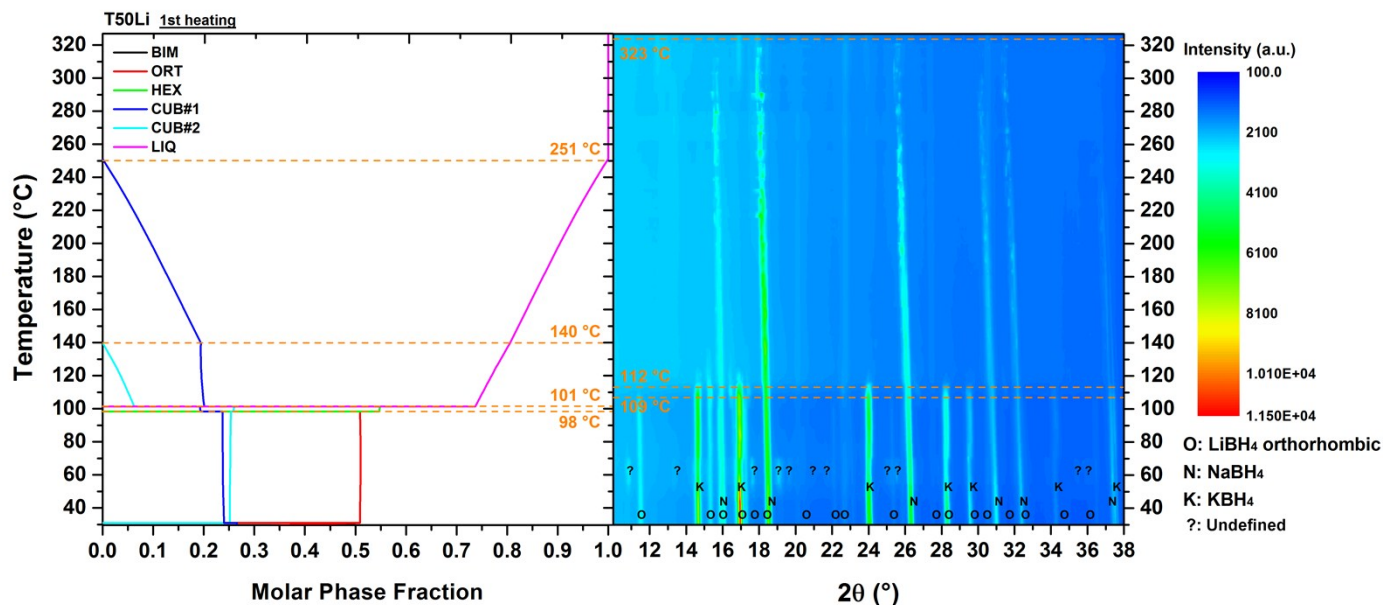

**Figure S2 - Amount of calculated phases (CALPHAD, left) and SR-PXD (right) of T50Li, 0.50LiBH<sub>4</sub>-0.25NaBH<sub>4</sub>-0.25KBH<sub>4</sub> ( $\lambda = 0.9938$  Å,  $\Delta T/\Delta t = 5$  °C/min, argon atmosphere).**

Polymorphic transition of LiBH<sub>4</sub> is observed at 109 °C (calculated temperature 98 °C), followed by eutectic melting at 112 °C (calculated temperature 101 °C). At 140 °C the calculations reveals the complete melting of the cubic phase two (KBH<sub>4</sub>) that is no more visible in the *in-situ* data after the eutectic melting. Experimental temperatures are higher with respect to calculated one probably because of kinetic reasons. Liquidus temperature is recorded at 323 °C (calculated temperature 251 °C).

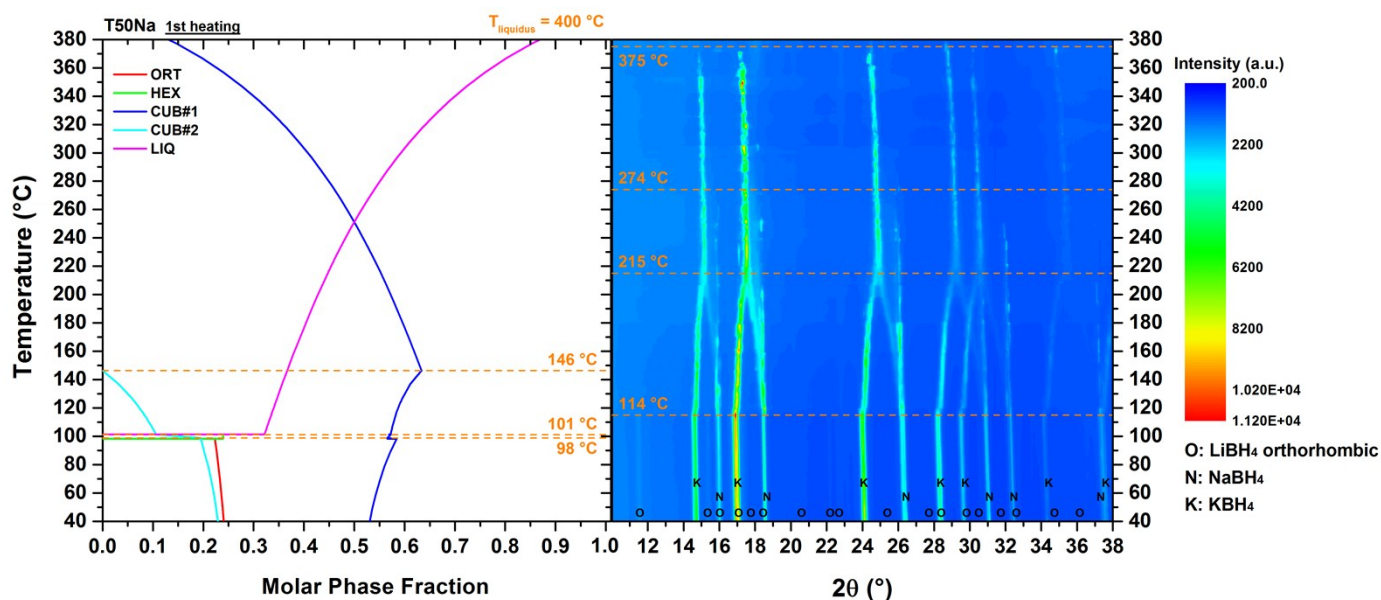

**Figure S3 - Amount of calculated phases (CALPHAD, left) and SR-PXD (right) of T50Na, 0.25LiBH<sub>4</sub>-0.50NaBH<sub>4</sub>-0.25KBH<sub>4</sub> ( $\lambda = 0.9938 \text{ \AA}$ ,  $\Delta T/\Delta t = 5 \text{ °C/min}$ , argon atmosphere).**

At 98 °C and 101 °C calculated temperature, polymorphic transition of LiBH<sub>4</sub> and eutectic melting are taking place respectively, but they are not clearly revealed by the *in-situ* investigation. At 185 °C (174 °C calculated temperature), the cubic phase two (KBH<sub>4</sub>) disappears because of the formation of a single-phase cubic solution. In the experiment, the solid solution between NaBH<sub>4</sub> and KBH<sub>4</sub> starts to form at 114 °C and one phase solid solution is observed at 215 °C. Liquidus temperature is recorded at 375 °C (calculated temperature 400 °C).

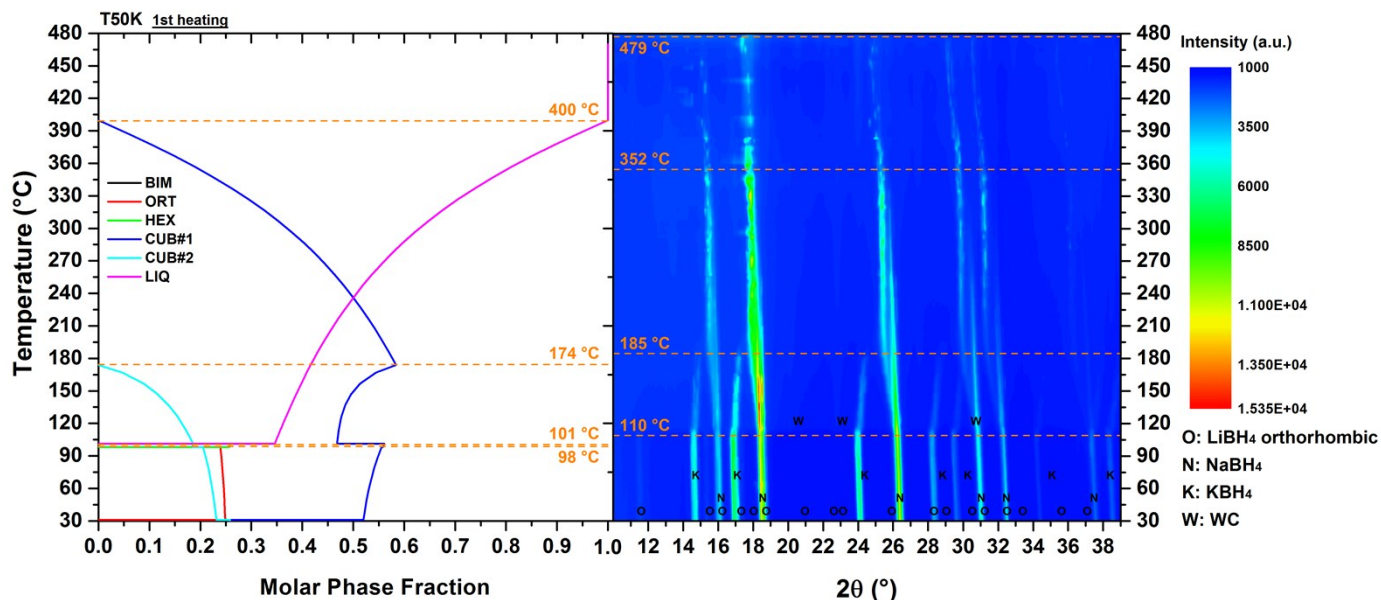

**Figure S4 - Amount of calculated phases (CALPHAD, left) and SR-PXD (right) of T50K, 0.25LiBH<sub>4</sub>-0.25NaBH<sub>4</sub>-0.50KBH<sub>4</sub> ( $\lambda = 0.9938 \text{ \AA}$ ,  $\Delta T/\Delta t = 5 \text{ °C/min}$ , argon atmosphere).**

As reported before, at 98 °C and 101 °C calculated temperature, polymorphic transition of LiBH<sub>4</sub> and eutectic melting are taking place respectively, from *in-situ* investigation the eutectic melting can be observed at 110 °C. At 185 °C (174 °C calculated temperature), the cubic phase two (KBH<sub>4</sub>) disappear because of the formation of a single-phase cubic solution. Liquidus temperature is recorded at 352 °C (calculated temperature 400 °C).

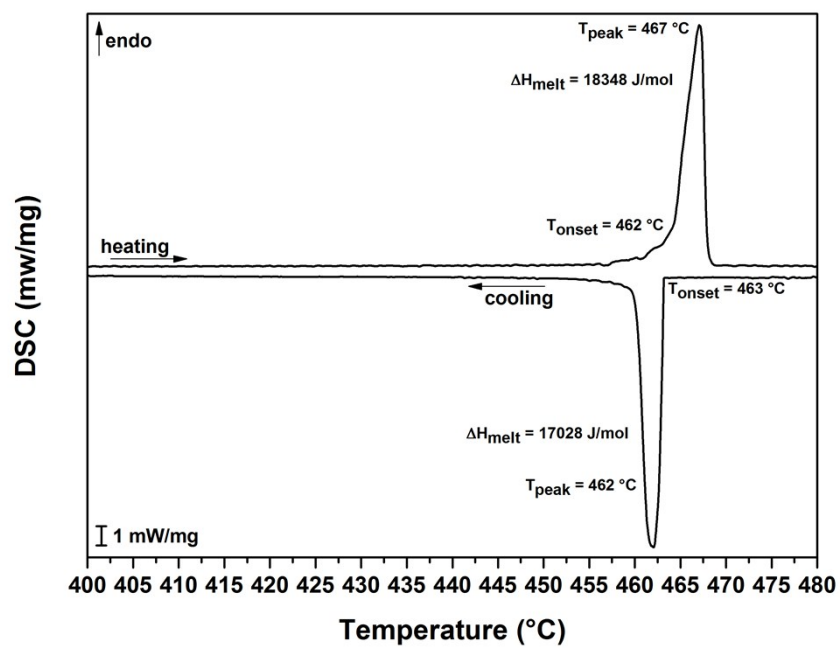

**Figure S5 – DSC of 0.682NaBH<sub>4</sub>-0.318KBH<sub>4</sub> mixture, heating and cooling at 5 °C/min under 10 bars of H<sub>2</sub>.**

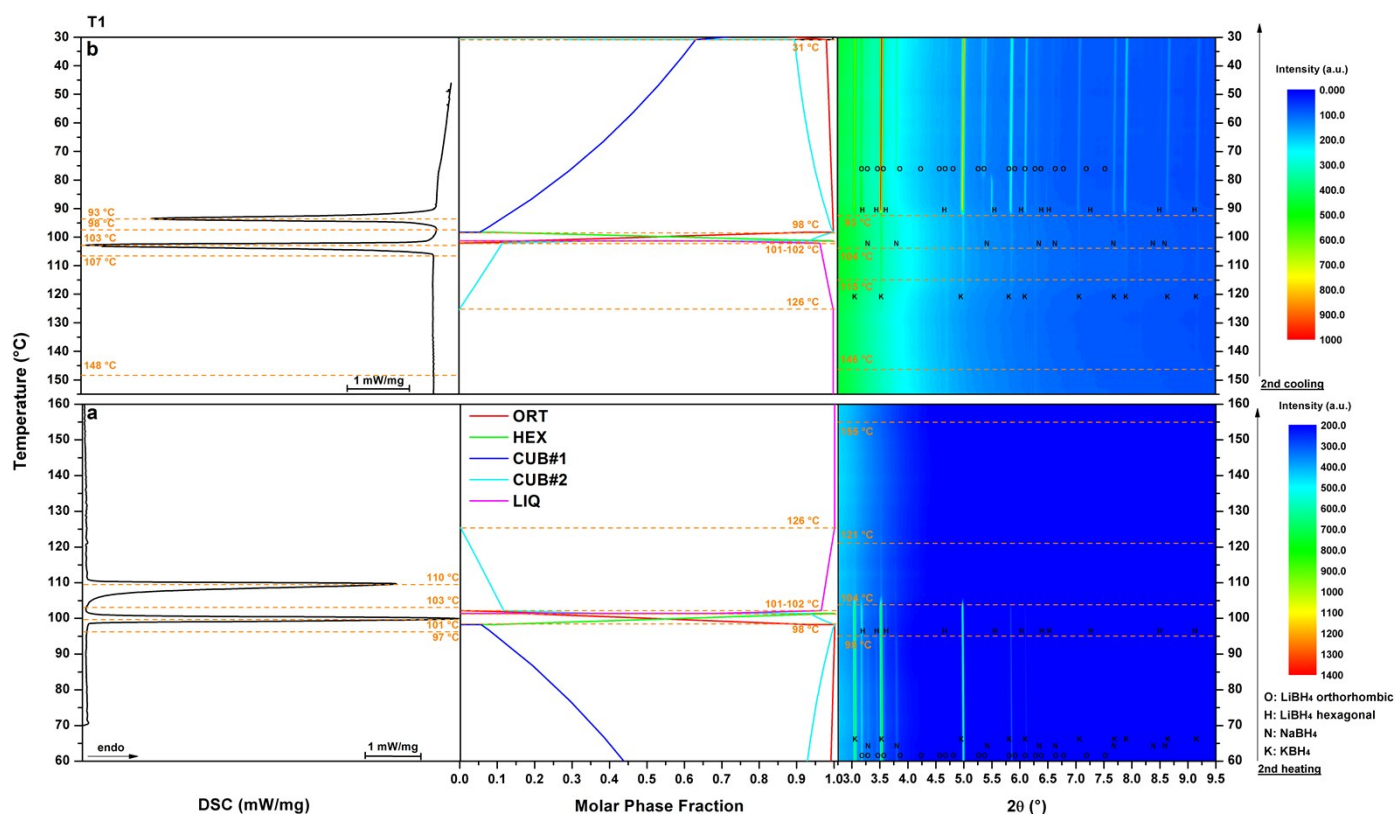

**Figure S6 – DSC (left), amount of calculated phases (CALPHAD, middle) and SR-PXD (right) of T1,  $0.65\text{LiBH}_4-0.08\text{NaBH}_4-0.27\text{KBH}_4$  ( $\lambda = 0.2072 \text{ \AA}$ ,  $\Delta T/\Delta t = 5 \text{ }^\circ\text{C}/\text{min}$ , argon atmosphere, 2<sup>nd</sup> cycle of heating (a) and cooling (b)).**

As reported before, at 98 °C and 101 °C calculated temperature, polymorphic transition of  $\text{LiBH}_4$  and eutectic melting are taking place respectively. From *in-situ* investigation, the transitions can be observed at 95 °C and 104 °C respectively, in good agreement also with DSC measurement (start of DSC peak at 97 °C and 103 °C, on heating, respectively). At 121 °C  $\text{NaBH}_4$  disappears (melting), and the liquidus temperature is recorded at 155 °C (calculated temperature 125 °C) but it cannot be clearly reveal by DSC measurements, only a noisy baseline is recorded after the eutectic melting. On cooling, the same transitions can be observed under undercooled conditions.



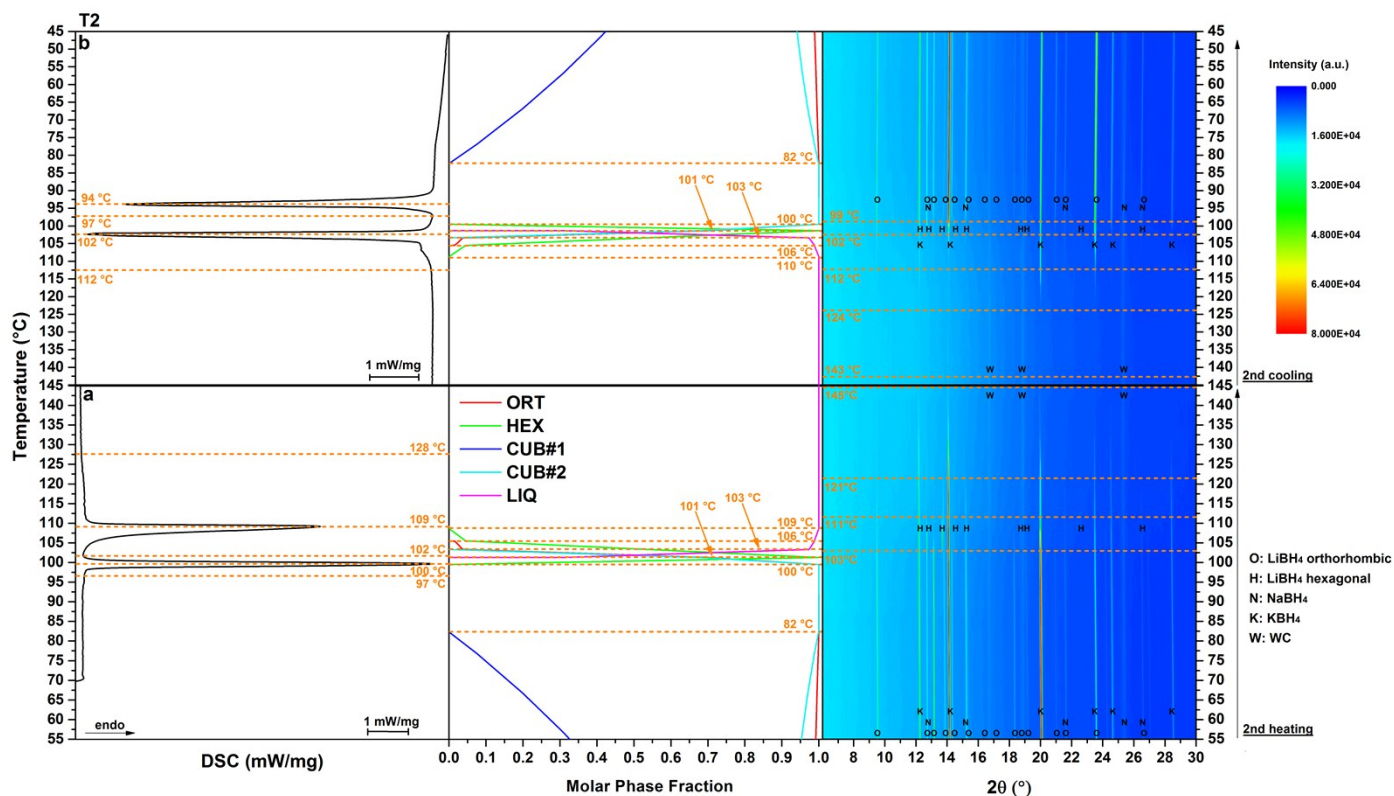

**Figure S7 – DSC (left), amount of calculated phases (CALPHAD, middle) and SR-PXD (right) of  $T2$ ,  $0.68\text{LiBH}_4\text{-}0.08\text{NaBH}_4\text{-}0.24\text{KBH}_4$  ( $\lambda = 0.8259 \text{ \AA}$ ,  $\Delta T/\Delta t = 5^{\circ}\text{C}/\text{min}$ , argon atmosphere, 2<sup>nd</sup> cycle of heating (a) and cooling (b)). Presence of WC due to ball milling.**

At  $82^{\circ}\text{C}$  calculated temperature, a single cubic solid solution phase is formed, but it is not revealed by *in-situ* investigation. At  $100^{\circ}\text{C}$  and  $101^{\circ}\text{C}$  calculated temperature, polymorphic transition of  $\text{LiBH}_4$  and eutectic melting are taking place respectively, while from *in-situ* investigation from  $103^{\circ}\text{C}$  to  $111^{\circ}\text{C}$  both orthorhombic and hexagonal  $\text{LiBH}_4$  are present and then melt. Calculations predict that the cubic phase is the first to melt ( $103^{\circ}\text{C}$ ), followed by the orthorhombic ( $106^{\circ}\text{C}$ ) and hexagonal phase ( $109^{\circ}\text{C}$ ). Experimentally orthorhombic and hexagonal phase are completely melted at  $111^{\circ}\text{C}$ , followed by the melting of  $\text{NaBH}_4$  ( $121^{\circ}\text{C}$ ) and  $\text{KBH}_4$  ( $145^{\circ}\text{C}$ , liquidus temperature,  $109^{\circ}\text{C}$  calculated liquidus temperature). On cooling, the same transitions can be observed under undercooled conditions.
